# Supplementary material for: Short Acquisition Time Super-Resolution Ultrasound Microvessel Imaging via Microbubble Separation
Source: PubMed Central journal article supplement (PMC7138805; doi:10.1038/s41598-020-62898-9), 2020-04-07
Supplement: 41598_2020_62898_MOESM1_ESM.pdf [file 41598_2020_62898_MOESM1_ESM.pdf]

# Short Acquisition Time Super-Resolution Ultrasound Microvessel Imaging via Microbubble Separation

Chengwu Huang<sup>1,§</sup>, Matthew R. Lowerison<sup>1,2,3,§</sup>, Joshua D. Trzasko<sup>1</sup>, Armando Manduca<sup>4</sup>, Yoram Bresler<sup>2,3,5</sup>, Shanshan Tang<sup>1</sup>, Ping Gong<sup>1</sup>, U-Wai Lok<sup>1</sup>, Pengfei Song<sup>1,2,3,\*</sup>, Shigao Chen<sup>1,\*</sup>

<sup>1</sup>Department of Radiology, Mayo Clinic College of Medicine and Science, Mayo Clinic, Rochester, MN,

<sup>2</sup>Beckman Institute, University of Illinois at Urbana-Champaign, Urbana, IL,

<sup>3</sup>Department of Electrical and Computer Engineering, University of Illinois at Urbana-Champaign, Urbana, IL,

<sup>4</sup>Department of Physiology and Biomedical Engineering, Mayo Clinic College of Medicine and Science, Rochester, MN,

<sup>5</sup>Coordinated Science Laboratory, University of Illinois at Urbana-Champaign, Urbana, IL

§ These authors contributed equally to this work.

\*Corresponding Authors:

Dr. Shigao Chen  
Department of Radiology  
Mayo Clinic  
200 First Street SW  
Rochester, MN 55905  
Email: [Chen.Shigao@mayo.edu](mailto:Chen.Shigao@mayo.edu)

Dr. Pengfei Song  
Department of Electrical and Computer Engineering  
Beckman Institute for Advanced Science and Technology  
University of Illinois at Urbana-Champaign  
405 N. Mathews Ave.  
Urbana, IL 61801  
Email: [songp@illinois.edu](mailto:songp@illinois.edu)

## Supplementary Figure Legends

### ***Figure S1 | ULM images obtained from separate subsets of data from the flow channel phantom***

ULM processing was performed on each subset of data extracted using the MB separation method, producing separate super-resolved images. (A) Super-resolved intensity images for the flow channel. (B) Super-resolved velocity magnitude image for the flow channel. The passband of the cone-shaped filter for each subset is indicated on the corresponding image. Notice that for each cone-shaped filter, the data was further split into two subsets with MBs moving towards or away from the transducer and processed separately.

### ***Figure S2 | Full field of view images of the chick brain***

(A) Ultrasound B-mode image of the chick brain. (B) Contrast-enhanced power Doppler image of the brain vasculature, which is subject to the diffraction limit of the ultrasound wave. (C) The proposed super-resolved ULM image with MB separation method.

### ***Figure S3 | An example of MB plane and cone shaped surface in the $k$ - $\omega$ domain***

An example of the 2D plane in the  $k$ - $\omega$  domain of an MB moving in a straight line with a constant velocity  $\mathbf{v}$  (and speed  $v = \|\mathbf{v}\|$ ), obtained by applying 3D Fourier transform to a simulated RF data of a MB (The black plates represent the MB energy in the 2D plane). All the 2D MB planes from MBs moving at speed  $v$  but in different directions form a space outside a cone-shaped surface defined by  $\|\omega\| = v\|\mathbf{k}\|$  in the  $k$ - $\omega$  domain (indicated on blue color).
